# Supplementary material
Source: PubMed Central journal article supplement (PMC3127549)
Supplement: NIHMS291818-supplement-1.pdf [file NIHMS291818-supplement-1.pdf]

## SUPPLEMENTARY MODELING METHODS

The overall structure of the multi-scale agent-based model for the immune response to Mtb infection in the lung as well as the detailed description of processes at each scale, including the stochastic cellular/tissue scale ABM and the deterministic ODE model of TNF/TNFR associated molecular processes, are presented. Figure 1 in the main text indicates how these models exist separately and how they are linked. All parameter definitions and values are listed in Supplementary Tables S1-3.

### Overall structure of the multi-scale ABM

The multi-scale ABM was developed based on four considerations: an environment, agents (immune cells), ABM rules that govern the agents and their interactions, and the time-step ( $\Delta t$ ) used to update events. The environment represents a two-dimensional section of lung parenchyma as a  $100 \times 100$  square lattice that simulates an area of  $2 \text{ mm} \times 2 \text{ mm}$ . Each grid micro-compartment is thus scaled to the approximate size of a single human macrophage,  $20 \text{ }\mu\text{m}$  in diameter. Discrete agents (macrophages and T cells) are recruited from specific micro-compartment on the lattice that represent vascular sources. Cells move on the lattice and interact with each other and the environment based on the ABM rules that are defined based on known biological activities. Due to the size difference between macrophages and T cells, up to two T cells are permitted to enter the same micro-compartment (with probability  $T_{moveT}$ ). A T cell may also move into the same micro-compartment as a macrophage (with probability  $T_{moveM}$ ). This model of cell spacing is a compromise between a realistic spatial representation and computational

tractability and is consistent with observations on macrophage and T cell dynamics during development of mycobacterial granulomas that show granuloma-associated T cells squeeze through cell junctions created by a dense macrophage network (1).

Extracellular Mtb and soluble molecules, including chemokines (CCL2, CCL5 and CXCL9/10/11), soluble TNF (sTNF) and shed TNFR2 are simulated as continuous entities that can reside anywhere on the lattice. Extracellular Mtb grow in each micro-compartment. Soluble molecules diffuse among micro-compartments. Caseation represents inflammation of and damage to the lung parenchyma from macrophage cell death. In the ABM, caseation is defined to occur when a specific number ( $N_{caseum}$ ) of infected or activated macrophages die in a micro-compartment. When a micro-compartment becomes caseated, any T cell present in the micro-compartment is killed and no further cells are permitted to enter the micro-compartment.

There are two major types of discrete agents in the model, macrophages and T cells. Macrophages are either resting ( $M_r$ , uninfected), infected ( $M_i$ ; have taken up Mtb), chronically infected ( $M_{ci}$ ; are unable to clear their intracellular Mtb due to a high number of bacterial load), or activated ( $M_a$ ; can effectively kill bacteria). Three distinct T cell classes based on their functions are modeled. The  $T_\gamma$  class represents CD4 and CD8 pro-inflammatory T cells;  $T_c$  class represents cytotoxic T cells (CTLs); and  $T_{reg}$  class represents regulatory T cells.

Cell-cell interactions are governed by ABM rules that are updated within every ABM time-step ( $\Delta t = 10$  min) and will be discussed in the next section. Single-cell molecular scale processes, including diffusion of soluble molecules on the lattice,

secretion of chemokines from individual cells and TNF/TNFR dynamics at the single-cell level, that generally occur in shorter time-scales compared to cellular interactions, are updated within shorter time-steps ( $dt = 6$  s). Thus, each molecular event is updated 100 times within each ABM time-step, the time in which each cellular scale event is updated once. The overall algorithm of the simulation takes the form outlined as follows and will be presented in detail in the following sections.

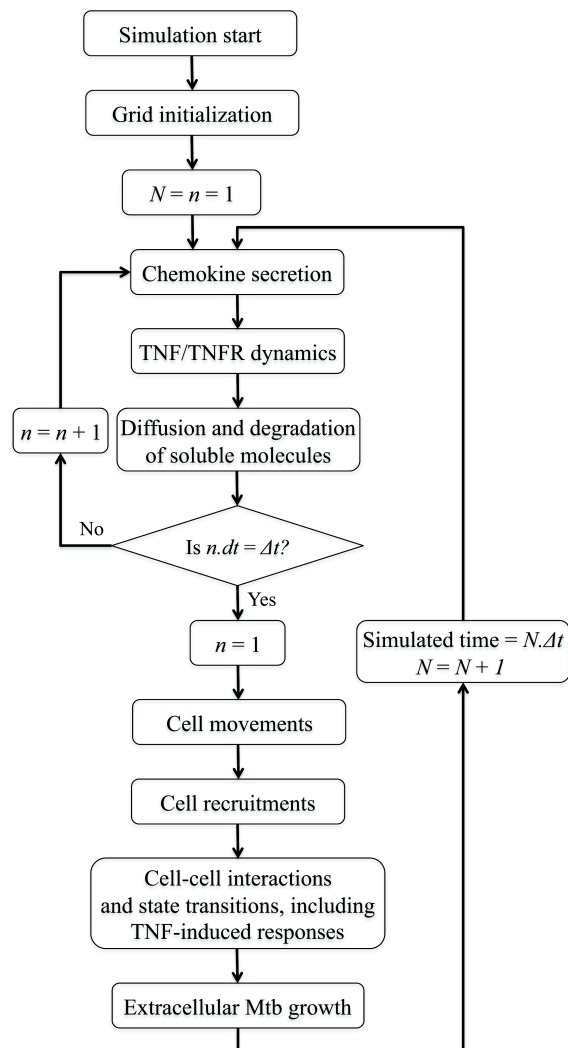

## **Grid initialization**

A  $100 \times 100$  two-dimensional grid is created. Periodic boundary conditions for cell movement and Dirichlet boundary conditions (zero outside grid perimeter) for molecular diffusion is used.  $N_{source} = 50$  vascular source locations are distributed on the grid. 49 of the vascular sources are randomly distributed in  $7 \times 7$  approximately equally sized partitions on the grid. One other micro-compartment is randomly selected from the whole grid as the last vascular source. Initial resting macrophages that represent resident alveolar macrophages are randomly placed on the grid. One infected macrophage with one intracellular Mtb is placed at the center of the grid. This is consistent with estimations of the minimum infection dose of Mtb that range from a single bacterium upward (2).

## **Cellular/tissue scale ABM rules**

Cells move, become recruited to the site of infection and respond to local conditions depending on their type and state according to rules that represent known biological activities *in vivo*. ABM rules that govern cell behaviors and interactions are as follows. Because the main goal of this study is to investigate the role of TNF availability and kinetics of TNF-associated molecular scale processes on the outcome of Mtb infection, we discuss TNF-independent chemokine-related processes (such as chemokine secretion, diffusion and degradation) in addition to cellular scale immunological details of the ABM in this section.

## Cell movements

### *1- Macrophages:*

Macrophages may stay in place or move in 8 possible directions on the grid based on CCL2 and CCL5 chemokine concentrations in their Moore neighborhood, the nine micro-compartments around the cell location including the micro-compartment occupied by the cell. Speed of movement only depends on the state of macrophages with the highest speed for  $M_r$  and the smallest speed (zero) for  $M_{ci}$ . The differences among macrophage speeds are shown in the model by time intervals in which each macrophage attempts once to move ( $t_{moveMr}$ ,  $t_{moveMi}$ ,  $t_{moveMa}$ ). There are minimum and maximum (saturating) concentration thresholds ( $\tau_{chem}$  and  $s_{chem}$ ) for the effect of each chemokine on the cell movement. Chemokine concentrations below  $\tau_{chem}$  or above  $s_{chem}$  do not have any effect on direction of movement. For simplicity we assume similar threshold values for all chemokines and cell types. Movement is random if chemokine concentrations in the Moore neighborhood are below  $\tau_{chem}$  or above  $s_{chem}$ . Otherwise, CCL2 and CCL5 concentrations in the Moore neighborhood determine a linear probability distribution for movement. We assume a bias for macrophage movement to the micro-compartment with the highest chemokine concentration. Hence, the highest chemokine concentration in the Moore neighborhood is multiplied by a factor 1.5 before calculation of movement probabilities. Movement is blocked by a caseous micro-compartment or macrophage presence and if blocked, no extra attempt for moving is made.

## 2- T cells:

T cell movements are updated in time intervals of length  $t_{MoveT}$  that is determined by the speed of T cell migration *in vivo*. Movement of  $T_{\gamma}$  cells depends on CCL2, CCL5 and CXCL9/10/11 concentrations in the Moore neighborhood.  $T_c$  cells move based on CCL5 and CXCL9/10/11 concentrations and  $T_{reg}$  cells move based on CCL5 concentrations. The details of T cell chemotactic movements are similar to what was described for macrophages. T cell movement is blocked by caseation. However, T cell movement to a micro-compartment that contains one macrophage or one T cell is possible with reduced probabilities,  $T_{moveM}$  and  $T_{moveT}$ , respectively.

## Cell recruitments

### 1- Macrophages:

Resting macrophages are recruited every time-step from vascular sources based on available TNF and chemokine concentrations in each vascular source, provided that the vascular source is not caseated nor blocked by a macrophage or two T cells. For a macrophage to be recruited from a vascular source, the following condition must be met. If  $\omega_{recTNF} \cdot [sTNF] + \omega_{recCCL2} \cdot [CCL2] + \omega_{recCCL5} \cdot [CCL5] > \tau_{recMac}$ ,  $M_r$  recruitment occurs with a probability  $M_{recr}$ ; where  $[sTNF]$ ,  $[CCL2]$  and  $[CCL5]$  are the numbers of sTNF, CCL2 and CCL5 molecules in the vascular source micro-compartment, respectively.

### 2- T cells:

Recruitment of T cells begins after a delay ( $t_{delay}$ ) that represents the time required for activation of the adaptive immune response following Mtb infection. T cell recruitment occurs for all vascular sources at every time-step with a probability  $T_{recr}$ . If T cell recruitment is allowed, then T cells of each class are recruited based on TNF and chemokine concentrations in each vascular source as described below, provided that the vascular source is not caseated or blocked by two T cells or one macrophage and another T cell. For a  $T_\gamma$  to be recruited, the following condition must be met. If  $\omega_{recTNF} \cdot [sTNF] + \omega_{recCCL2} \cdot [CCL2] + \omega_{recCCL5} \cdot [CCL5] + \omega_{recCXCL9/10/11} \cdot [CXCL9/10/11] > \tau_{recTgam}$ ,  $T_\gamma$  recruitment is permitted with a probability  $T_{recTgam}$ . Otherwise,  $T_c$  recruitment can occur. If  $\omega_{recTNF} \cdot [sTNF] + \omega_{recCCL5} \cdot [CCL5] + \omega_{recCXCL9/10/11} \cdot [CXCL9/10/11] > \tau_{recTcyt}$ ,  $T_c$  recruitment is permitted with a probability  $T_{recTcyt}$ . Otherwise,  $T_{reg}$  recruitment can occur. If  $\omega_{recTNF} \cdot [sTNF] + \omega_{recCCL5} \cdot [CCL5] > \tau_{recTreg}$ ,  $T_{reg}$  recruitment is permitted with a probability  $T_{recTreg}$ .

### **Cell-cell interactions and state transitions**

All cell-cell interactions and state transitions described below are updated every time-step for all cells.

#### *1- Cell death due to age:*

All macrophages that are initially distributed or recruited on the grid are assigned a lifespan selected from a uniform distribution between zero and  $max_{ageMac}$ . T cells are also assigned a lifespan randomly distributed between zero and  $max_{ageTcell}$ .  $M_a$  has a shortened

lifespan of  $max_{ageActive}$ . At death,  $M_r$  and T cells are removed from the grid. At death,  $M_i$  and  $M_{ci}$  are removed from the grid and intracellular Mtb from dead cells are dispersed uniformly in the Moore neighborhood including the micro-compartment originally occupied by the cell.  $M_a$  death contributes to caseation of the micro-compartment.

### 2- ABM rules for $M_r$ :

There is a chance of STAT-1 activation in a time-step as a result of interaction between a  $M_r$  and IFN- $\gamma$  producing  $T_\gamma$  cells with a probability ( $n_{Tgam} \cdot P_{STAT1}$ ); where,  $n_{Tgam}$  is the number of  $T_\gamma$  cells surrounding the  $M_r$  in the Moore neighborhood including the micro-compartment occupied by the  $M_r$ .

$M_r$  is able to uptake or to kill extracellular Mtb that reside in the same micro-compartment. If the number of extracellular Mtb ( $B_{ext}$ )  $\leq N_{rk}$ ,  $M_r$  kills them. Otherwise, it either kills  $N_{rk}$  of the extracellular Mtb with probability  $P_k$  or becomes infected ( $M_i$ ) after uptake of  $N_{rk}$  of the extracellular Mtb as its initial intracellular Mtb.

If both STAT1 and NF- $\kappa$ B are activated in a  $M_r$  and it is not already down-regulated by a  $T_{reg}$ , it becomes activated ( $M_a$ ). If the remaining lifespan of such an activated macrophage is greater than  $max_{ageActive}$ , it will be shortened to  $max_{ageActive}$ .

### 3- ABM rules for $M_i$ :

Intracellular Mtb ( $B_{int}$ ) replicate in  $M_i$  every time-step according to the following equation:

$$B_{int}(t + \Delta t) = (1 + \alpha_{Bi})B_{int}(t) \quad (1)$$



$M_i$  is able to uptake but not kill extracellular bacteria from its micro-compartment with a probability ( $P_{uptakeM_i}$ ) that is computed as a function of  $B_{int}$  as follows:

$$P_{uptakeM_i} = (N_c - B_{int})/100 \quad (2)$$

$M_i$  takes up  $N_{rk}$  of extracellular bacteria if  $B_{ext} > N_{rk}$ . Otherwise, it takes up all extracellular bacteria that are available in the micro-compartment. If the number of intracellular Mtb ( $B_{int}$ ) exceeds a threshold  $N_c$ , the  $M_i$  becomes chronically infected ( $M_{ci}$ ).

There is a chance of STAT-1 activation in a time-step as a result of interaction between a  $M_i$  and IFN- $\gamma$  producing  $T_\gamma$  cells with a probability ( $n_{Tgam} \cdot P_{STAT1}$ ) where,  $n_{Tgam}$  is the number of  $T_\gamma$  cells surrounding the  $M_i$  in the Moore neighborhood (including the micro-compartment occupied by the  $M_i$ ). If both STAT1 and NF- $\kappa$ B are activated in a  $M_i$  and it is not already down-regulated by a  $T_{reg}$ , it becomes activated ( $M_a$ ). If the remaining lifespan of such an activated macrophage is greater than  $max_{ageActive}$ , it will be shortened to  $max_{ageActive}$ .

#### 4- ABM rules for $M_{ci}$ :

Intracellular Mtb ( $B_{int}$ ) replicate in  $M_{ci}$  every time-step according to Equation 1. If the number of intracellular Mtb exceeds a threshold ( $N_{burst}$ ),  $M_{ci}$  bursts and its intracellular Mtb are evenly distributed to the Moore neighborhood surrounding the  $M_{ci}$  (including the micro-compartment occupied by the cell).  $M_{ci}$  bursting contributes to caseation of the micro-compartment.

#### 5- ABM rules for $M_a$ :

$M_a$  is capable of effectively killing extracellular Mtb. Each time-step,  $M_a$  kills  $N_{ak}$  of the extracellular Mtb in its micro-compartment.

*6- ABM rules for  $T_c$ :*

If  $T_c$  is not already down-regulated by a  $T_{reg}$  and there is a  $M_i$  or  $M_{ci}$  present in the same micro-compartment as  $T_c$ , there is a chance of perforin/granulysin-mediated killing of  $M_i$  or  $M_{ci}$  with probability  $P_{cytKill}$ .  $M_i$  killing by a  $T_c$  kills all intracellular Mtb and contributes to caseation of the micro-compartment. In the case of  $M_{ci}$  killing, the intracellular Mtb are killed with probability  $P_{cytKillClean}$ . Otherwise, the intracellular Mtb will be uniformly distributed in the Moore neighborhood (including the micro-compartment occupied by the cell).  $M_{ci}$  killing by  $T_c$  also contributes to caseation of the micro-compartment.

*7- ABM rules for  $T_\gamma$ :*

If  $T_\gamma$  is not already down-regulated by a  $T_{reg}$  and there is a  $M_i$  or  $M_{ci}$  present in the same micro-compartment as  $T_\gamma$ , there is a chance of Fas/FasL-induced apoptosis of  $M_i$  or  $M_{ci}$  with probability  $P_{apop/Fas}$ . As a result of apoptosis, half of the intracellular Mtb in  $M_i$  or  $M_{ci}$  will be killed and the other half will be equally distributed in the Moore neighborhood (including the micro-compartment occupied by the cell).

*8- ABM rules for  $T_{reg}$ :*

Regulatory T cells suppress or down-regulate the action of T cells and macrophages through poorly understood mechanisms that may occur by cell contact, secretion of immunosuppressive cytokines or both (3, 4).  $T_{reg}$  here down-regulates all cells (macrophages,  $T_c$  and  $T_\gamma$ ) in its Moore neighborhood including its own micro-

compartment. Down-regulated states last for  $t_{regMac}$ ,  $t_{regTgam}$  and  $t_{regTcyt}$  for macrophages,  $T_c$  and  $T_\gamma$  cells, respectively. Consequences of  $T_{reg}$  down-regulation for each cell type is explained in sections that describe ABM rules for that cell type.

### Extracellular Mtb growth

Growth of extracellular Mtb ( $B_{ext}$ ) in all micro-compartments is calculated based on the following equation:

$$B_{ext}(t + \Delta t) = B_{ext}(t) + \alpha_{Be} B_{ext}(t) \left[ 1 - \frac{B_{ext}(t)}{1.1K_{be}} \right] \quad (3)$$

### Chemokine secretion

$M_i$ ,  $M_{ci}$ ,  $M_a$ , NF- $\kappa$ B activated  $M_r$  and NF- $\kappa$ B activated  $M_i$  are able to secrete chemokines, provided that they are not down-regulated by  $T_{reg}$ . The rates of chemokine secretion for different cell types are as follows.  $M_{ci}$ ,  $M_a$  and NF- $\kappa$ B activated  $M_i$  are able to secrete chemokines with full secretion rates ( $r_{CCL2}$ ,  $r_{CCL5}$  and  $r_{CXCL9}$ ) as listed in Supplementary Table S1. NF- $\kappa$ B activated  $M_r$  and  $M_i$  cells that are not NF- $\kappa$ B activated secrete chemokines with half-full secretion rates ( $0.5 \times r_{CCL2}$ ,  $0.5 \times r_{CCL5}$  and  $0.5 \times r_{CXCL9}$ ). Caseated micro-compartments also secrete attractants that attract immune cells. For simplicity, we use quarter-full rates of chemokine secretion to simulate the effect of such attractants ( $0.25 \times r_{CCL2}$ ,  $0.25 \times r_{CCL5}$  and  $0.25 \times r_{CXCL9}$ ). Chemokine secretions to the

micro-compartments on the grid are updated in time intervals of  $dt$ . Secretion of TNF will be discussed in TNF/TNFR dynamics section.

### Diffusion and degradation

The equation for diffusion and degradation of chemokines and other soluble molecules, including sTNF and shed TNFR2, can be implemented numerically on the grid by using an iterative finite-difference method. This form of this equation in two dimensions is as follows:

$$\frac{\partial C}{\partial t} = D\left(\frac{\partial^2 C}{\partial x^2} + \frac{\partial^2 C}{\partial y^2}\right) - \delta C \quad (4)$$

where  $C$  is the concentration of diffusing molecule that changes with time ( $t$ ) in the  $x$  and  $y$  directions,  $D$  is the diffusion coefficient for the molecule in the diffusion environment, and  $\delta$  is the degradation rate constant. Rewriting this equation using a finite difference approximation for discrete-time discrete-space diffusion on our grid gives:

$$C_{i,j}(t + dt) = (1 - \delta dt)C_{i,j}(t) + \frac{\lambda}{4}\{C_{i-1,j}(t) + C_{i+1,j}(t) + C_{i,j-1}(t) + C_{i,j+1}(t) - 4C_{i,j}(t)\} \quad (5)$$

where  $C_{i,j}(t)$  is the concentration of the diffusing molecule in the micro-compartment  $(i,j)$  at time  $t$  and  $\lambda$  is determined as a function of  $D$ , diffusion time-step ( $dt = 6$  s), and lattice spacing through which diffusion occurs ( $dx = 20$   $\mu\text{m}$ ):

$$\lambda = \frac{4Ddt}{(dx)^2} \quad (6)$$

Solution to Equation 5 is stable if  $\lambda < 1$ . Thus,  $dt$  and  $dx$  must be picked accordingly.

### **Extensions and updates to the ABM rules described by Ray *et al***

In the previous sub-sections we presented the ABM rules describing cellular/tissue scale activities and interactions. As mentioned earlier, this model was first developed by Segovia-Juarez *et al* (5) and later extended by Ray *et al* (6). The differences and extensions of the cellular/tissue scale ABM used in this study compared with the ABM by Ray *et al* are as follows:

- 1)  $T_\gamma$  cells used to have two different active states. These two states have been merged, as they were not significantly different and introduced unnecessary complexity to the model.
- 2) In order to have more realistic down-regulatory mechanisms in the model,  $T_c$  cells and macrophages according to the published data reviewed in (7), in addition to  $T_\gamma$  cells, can be down-regulated by  $T_{reg}$  cells. When down-regulated,  $T_c$  cells lose their cytotoxic capabilities for a fixed period of time  $t_{regT_{cyt}}$ . Following macrophage down-regulation, STAT1 is deactivated and the macrophage does nothing but moves for a fixed period of time  $t_{regMac}$ .
- 3) The extracellular bacteria threshold for NF- $\kappa$ B activation,  $B_{actM}$ , has been extended to consider the Moore neighborhood, rather than the local micro-compartment.
- 4) We assume that a fully activated macrophage can only secrete TNF and chemokines at the maximal rate. Thus, resting macrophages that have been NF- $\kappa$ B activated but have

not been STAT-1 activated now secrete TNF and chemokines at half rate compared with activated macrophages.

5) We did not consider possibility of Mtb uptake by infected macrophages in our previous model. Infected macrophages now have the ability to uptake additional extracellular bacteria; the probability of extracellular Mtb uptake is inversely proportional to the number of intracellular Mtb that reside in the macrophage.

6) TNF-induced NF- $\kappa$ B activation and apoptosis were previously modeled as events that occurred with probabilities of 100% and 4% (approximated via uncertainty analysis) for extracellular TNF concentrations above specific thresholds. Here, we have revised TNF-induced cell responses as will be discussed in detail in later sections.

7) We have revised the user interface for performing our modeling studies so that we can easily visualize and track different aspects of the granuloma, including the structure and molecular concentration gradients, as it forms and is maintained. In order to satisfy the cross-platform requirement, we make use of the Qt framework. Qt is a C++ framework for developing cross-platform applications with a graphical user interface (GUI).

## **ODEs that govern molecular scale TNF/TNFR dynamics**

The binding interactions and reactions controlling TNF/TNFR dynamics at the single-cell level regardless of the cell type are schematically illustrated in the main text (Figure 1B). TNF is first synthesized by TNF-producing cells ( $M_i$ ,  $M_{ci}$ ,  $M_a$ , NF- $\kappa$ B activated  $M_r$ ,  $T_\gamma$  and  $T_c$ ), if not down-regulated by  $T_{reg}$  cells, as a membrane-bound precursor form

(mTNF) that can then be processed and released as a soluble form (sTNF) into extracellular spaces. This processing occurs via a cell-associated metalloproteinase called TACE. Two types of TNF receptors (TNFR1 and TNFR2) are synthesized and expressed on the cell surface as free receptors. Soluble TNF (sTNF) reversibly binds to TNFRs on the cell membrane. sTNF-bound cell surface TNFR1 internalizes and sTNF-bound cell surface TNFR2 may undergo internalization or shedding into extracellular spaces (8). Internalized receptors may degrade or recycle to the cell membrane where they can re-bind to sTNF (9). Ligand-free TNFRs also turn over (internalize) (9, 10). Intact sTNF may dissociate from the shed sTNF/TNFR2 complex in the extracellular space (11). We modeled these molecular processes based on mass action kinetics as shown in Supplementary Table S4; model equations are listed in Supplementary Table S5; definitions and values of the rate constants are given in Supplementary Table S2. Note that the rates of mTNF synthesis and release from the cell membrane and TNFR synthesis ( $k_{synth}$ ,  $k_{TACE}$ ,  $V_{r1}$  and  $V_{r2}$ ) are cell type/state-specific as indicated in Supplementary Table S2, but other rate constant values are common between all cells. Note that this ODE model was presented previously (12) and is described here for completeness.

In the multi-scale model described in this work, the rates of mTNF synthesis for different cell types are as follows.  $M_{ci}$ ,  $M_a$  and NF- $\kappa$ B activated  $M_i$  are able to synthesize mTNF with a full rate ( $k_{synth} = k_{synthMac}$ ) as shown in Supplementary Table S2. NF- $\kappa$ B activated  $M_r$  and NF- $\kappa$ B deactivated  $M_i$  express mTNF with a half-full rate ( $k_{synth} = 0.5 \times k_{synthMac}$ ).  $T_\gamma$  cells and  $T_c$  cells express mTNF with rates  $k_{synthTcell}$  and  $0.1 \times k_{synthTcell}$ , respectively.  $T_{reg}$ -down-regulated cells do not express TNF. TACE activity is also assumed to be cell type-dependent as shown in Supplementary Table S2.

TNF/TNFR dynamics model ODEs are solved for each individual cell on the grid in combination with TNF diffusion and degradation equations using the time-step  $dt$ . Soluble molecules in the model (sTNF and sTNF/TNFR<sub>2shed</sub>) are expressed as volumetric concentration units (e.g. M), whereas cell-associated species are expressed as # of molecules per cell. Thus, when a membrane-bound molecule releases to the extracellular space (i.e. the micro-compartment occupied by the cell), or when a soluble molecule binds to the cell membrane, a scaling factor ( $\rho/N_{av}$ ) is required as indicated in Supplementary Table S5, where  $\rho$  is the cell density in the micro-compartment and can be computed as  $(dx)^{-3}$  assuming that each micro-compartment is a cube of side  $dx$ .

## **NF- $\kappa$ B activation and apoptosis**

TNF-induced NF- $\kappa$ B activation and TNF-induced apoptosis are modeled, as described in the main text, as Poisson processes with rate parameters computed as functions of molecular concentrations from the ODE model. NF- $\kappa$ B activation is checked once for all  $M_r$  and  $M_i$  within each ABM time-step ( $\Delta t$ ). NF- $\kappa$ B pathway can also be activated in  $M_r$  or  $M_i$  if the number of extracellular bacteria ( $B_{ext}$ ) in the Moore neighborhood micro-compartments exceeds a threshold ( $B_{actM}$ ). TNF-induced apoptosis is checked once for all cells on the grid within each time-step ( $\Delta t$ ). If the apoptotic cell is a  $M_i$  or  $M_{ci}$ , half of the intracellular Mtb in  $M_i$  or  $M_{ci}$  will be killed as a result of apoptosis and the other half will be equally distributed in the Moore neighborhood including the micro-compartment occupied by the cell.



1. Egen, J. G., A. G. Rothfuchs, C. G. Feng, N. Winter, A. Sher, and R. N. Germain. 2008. Macrophage and T cell dynamics during the development and disintegration of mycobacterial granulomas. *Immunity* 28: 271-284.
2. Russell, D. G., C. E. Barry 3rd, and J. L. Flynn. 2010. Tuberculosis: what we don't know can, and does, hurt us. *Science* 328: 852-856.
3. Baatar, D., P. Olkhanud, K. Sumitomo, D. Taub, R. Gress, and A. Biragyn. 2007. Human peripheral blood T regulatory cells (Tregs), functionally primed CCR4+ Tregs and unprimed CCR4- Tregs, regulate effector T cells using FasL. *J. Immunol.* 178: 4891-4900.
4. Thornton, A. M. and E. M. Shevach. 1998. CD4+CD25+ immunoregulatory T cells suppress polyclonal T cell activation in vitro by inhibiting interleukin 2 production. *J. Exp. Med.* 188: 287-296.
5. Segovia-Juarez, J. L., S. Ganguli, and D. Kirschner. 2004. Identifying control mechanisms of granuloma formation during M. tuberculosis infection using an agent-based model. *J. Theor. Biol.* 231: 357-376.
6. Ray, J. C., J. L. Flynn, and D. E. Kirschner. 2009. Synergy between individual TNF-dependent functions determines granuloma performance for controlling Mycobacterium tuberculosis infection. *J. Immunol.* 182: 3706-3717.
7. Sakaguchi, S., M. Miyara, C. M. Costantino, and D. A. Hafler. 2010. FOXP3+ regulatory T cells in the human immune system. *Nat. Rev. Immunol.* 10: 490-500.
8. Higuchi, M. and B. B. Aggarwal. 1994. TNF induces internalization of the p60 receptor and shedding of the p80 receptor. *J. Immunol.* 152: 3550-3558.
9. Bajzer, Z., A. C. Myers, and S. Vuk-Pavlovic. 1989. Binding, internalization, and intracellular processing of proteins interacting with recycling receptors. A kinetic analysis. *J. Biol. Chem.* 264: 13623-13631.
10. Vuk-Pavlovic, S. and J. S. Kovach. 1989. Recycling of tumor necrosis factor-alpha receptor in MCF-7 cells. *FASEB J.* 3: 2633-2640.
11. Aderka, D., H. Engelmann, Y. Maor, C. Brakebusch, and D. Wallach. 1992. Stabilization of the bioactivity of tumor necrosis factor by its soluble receptors. *J. Exp. Med.* 175: 323-329.
12. Fallahi-Sichani, M., M. A. Schaller, D. E. Kirschner, S. L. Kunkel, and J. J. Linderman. 2010. Identification of key processes that control tumor necrosis factor availability in a tuberculosis granuloma. *PLoS Comput. Biol.* 6: e1000778.

**Supplementary Table S1:** TNF-independent and cellular/tissue scale parameters, definitions and values estimated from literature as described in (1), or approximated via uncertainty analysis as described in Methods. Further descriptions of parameters, if needed, are presented in Supporting Text.

| Parameter                          | Parameter description                                                  | Value*                                                           |
|------------------------------------|------------------------------------------------------------------------|------------------------------------------------------------------|
| $N_{source}$                       | Number of vascular sources                                             | 50                                                               |
| $N_{caseum}$                       | Number of qualified cell deaths required for caseation                 | 7                                                                |
| $D_{chem}$ (cm <sup>2</sup> /s)    | Diffusion coefficient of chemokines                                    | $10^{-8}$ - $10^{-7}$ ( $5.2 \times 10^{-8}$ )                   |
| $\delta_{chem}$ (s <sup>-1</sup> ) | Chemokine degradation rate constant                                    | $10^{-4}$ - $10^{-3}$ ( $4.58 \times 10^{-4}$ )                  |
| $\tau_{chem}$ (molecules)          | Minimum chemokine concentration threshold                              | 1-10 (2)                                                         |
| $s_{chem}$ (molecules)             | Saturating chemokine concentration threshold                           | $10^3$ - $10^4$ (2000)                                           |
| $M_{init}$                         | Initial number of resident macrophages                                 | 105                                                              |
| $max_{ageMac}$ (day)               | Maximum lifespan of macrophages                                        | 100                                                              |
| $max_{ageActive}$ (day)            | Maximum lifespan of an active macrophage                               | 10                                                               |
| $t_{regMac}$ (hours)               | Macrophage inactivity time after down-regulation by $T_{reg}$          | 12                                                               |
| $t_{moveMr}$ (min)                 | Time interval for $M_r$ movement                                       | 20                                                               |
| $t_{moveMa}$ (hour)                | Time interval for $M_a$ movement                                       | 7.8                                                              |
| $t_{moveMi}$ (hour)                | Time interval for $M_i$ movement                                       | 24                                                               |
| $r_{CCL2}$ (molecules per 10 min)  | Full secretion rate of CCL2                                            | 35.5                                                             |
| $r_{CCL5}$ (molecules per 10 min)  | Full secretion rate of CCL5                                            | 35.5                                                             |
| $r_{CXCL9}$ (molecules per 10 min) | Full secretion rate of CXCL9/10/11                                     | 71                                                               |
| $\omega_{recTNF}$                  | Effect of TNF on cell recruitment                                      | 1                                                                |
| $\omega_{recCCL2}$                 | Effect of CCL2 on cell recruitment                                     | 0.0507                                                           |
| $\omega_{recCCL5}$                 | Effect of CCL5 on cell recruitment                                     | 0.0507                                                           |
| $\omega_{recCXCL9/10/11}$          | Effect of CXCL9 on cell recruitment                                    | 0.0254                                                           |
| $N_{rk}$                           | Number of extracellular Mtb engulfed by $M_r$ or $M_i$                 | 1                                                                |
| $P_k$                              | Probability of $M_r$ killing bacteria                                  | 0.01-0.1 (0.015)                                                 |
| $B_{actM}$                         | Number of extracellular Mtb activating NF- $\kappa$ B in a mac         | 50-150 (110)                                                     |
| $N_c$                              | Number of intracellular Mtb for $M_i \rightarrow M_{ci}$ transition    | 10                                                               |
| $N_{burst}$                        | Number of intracellular Mtb that leads to $M_{ci}$ bursting            | 20-30 (20)                                                       |
| $P_{STAT1}$                        | Probability of STAT-1 activation in $M_r$ or $M_i$                     | 0.001-0.1 (0.085)                                                |
| $N_{ak}$                           | Number of extracellular Mtb killed by $M_a$ each time-step             | 10                                                               |
| $\tau_{recMac}$                    | TNF/chemokine threshold for $M_r$ recruitment                          | 0.01-0.1 (0.023)                                                 |
| $M_{recr}$                         | Probability of $M_r$ recruitment                                       | 0.01-0.1 (0.04)                                                  |
| $max_{ageTcell}$ (day)             | Maximum lifespan of T cells                                            | 3                                                                |
| $t_{delay}$ (day)                  | T cell recruitment delay                                               | 20                                                               |
| $T_{moveM}$                        | Probability of T cell moving to a mac-containing location              | 0.001-0.1 (0.014)                                                |
| $T_{moveT}$                        | Probability of T cell moving to a T cell-containing location           | 0.001-0.1 (0.08)                                                 |
| $T_{recr}$                         | Probability of T cell recruitment                                      | 0.05-0.5 (0.15)                                                  |
| $t_{regTgam}$ (min)                | $T_\gamma$ inactivity time after down-regulation by $T_{reg}$          | 100                                                              |
| $P_{apop/Fas}$                     | Probability of Fas/FasL apoptosis by $T_\gamma$                        | 0.01-0.1 (0.06)                                                  |
| $\tau_{recTgam}$                   | TNF/chemokine threshold for $T_\gamma$ recruitment                     | 0.1-1.0 (0.4)                                                    |
| $T_{recTgam}$                      | Probability of $T_\gamma$ recruitment                                  | 0.54                                                             |
| $t_{regTcyt}$ (min)                | $T_c$ inactivity time after down-regulation by $T_{reg}$               | 100                                                              |
| $\tau_{recTcyt}$                   | TNF/chemokine threshold for $T_c$ recruitment                          | 0.1-1.0 (0.4)                                                    |
| $T_{recTcyt}$                      | Probability of $T_c$ recruitment                                       | 0.36                                                             |
| $P_{cytKill}$                      | Probability of $T_c$ killing $M_i$ or $M_{ci}$                         | 0.02 0.2 (0.12)                                                  |
| $P_{cytKillClean}$                 | Probability of $T_c$ killing all intracellular Mtb by killing $M_{ci}$ | 0.75                                                             |
| $\tau_{recTreg}$                   | TNF/chemokine threshold for $T_{reg}$ recruitment                      | 0.01-0.1 (0.05)                                                  |
| $T_{recTreg}$                      | Probability of $T_{reg}$ recruitment                                   | 0.1                                                              |
| $\alpha_{Bi}$ (per 10 min)         | Intracellular Mtb growth rate                                          | $2 \times 10^{-4}$ - $2 \times 10^{-3}$ ( $1.4 \times 10^{-3}$ ) |
| $\alpha_{Be}$ (per 10 min)         | Extracellular Mtb growth rate                                          | $10^{-4}$ - $10^{-3}$ ( $7 \times 10^{-4}$ )                     |
| $K_{be}$                           | Capacity of a micro-compartment for extracellular Mtb                  | 200                                                              |

\* Parameters used for sensitivity analysis are indicated by their ranges of values. Values in parentheses are used to generate containment baseline.

1. Ray, J. C., J. L. Flynn, and D. E. Kirschner. 2009. Synergy between individual TNF-dependent functions determines granuloma performance for controlling *Mycobacterium tuberculosis* infection. *J. Immunol.* 182: 3706

**Supplementary Table S2: Molecular/single-cell scale TNF/TNFR parameters, definitions and values estimated from literature**

| Parameter                                    | Parameter description                                          | Value*                                                               | Reference   |
|----------------------------------------------|----------------------------------------------------------------|----------------------------------------------------------------------|-------------|
| $k_{synthMac}$ (#/cell.s)                    | Full synthesis rate of mTNF for macrophages                    | $10^{-1}$ -1 (0.21)                                                  | (1)         |
| $k_{synthTcell}$ (#/cell.s)                  | Full synthesis rate of mTNF for T cells                        | $10^{-2}$ - $10^{-1}$ (0.021)                                        | (2)         |
| $TNFR1_{mac}$ (#/cell)                       | TNFR1 density on the surface of macrophages                    | 500-5000 (1100-1900) <sup>†</sup>                                    | (1, 3-5)    |
| $TNFR1_{Tcell}$ (#/cell)                     | TNFR1 density on the surface of T cells                        | 500-5000 (400-1200) <sup>†</sup>                                     | (1, 3-5)    |
| $TNFR2_{mac}$ (#/cell)                       | TNFR2 density on the surface of macrophages                    | 500-5000 (400-800) <sup>†</sup>                                      | (1, 3-5)    |
| $TNFR2_{Tcell}$ (#/cell)                     | TNFR2 density on the surface of T cells                        | 500-5000 (600-800) <sup>†</sup>                                      | (1, 3-5)    |
| $D_1$ (cm <sup>2</sup> /s) <sup>‡</sup>      | Diffusion coefficient of sTNF                                  | $10^{-8}$ - $10^{-7}$ ( $5.2 \times 10^{-8}$ )                       | (6, 7)      |
| $D_2$ (cm <sup>2</sup> /s) <sup>‡</sup>      | Diffusion coefficient of shed TNF/TNFR2 complex                | $10^{-8}$ - $10^{-7}$ ( $3.2 \times 10^{-8}$ )                       | (6, 7)      |
| $k_{TACE\_Mac}$ (s <sup>-1</sup> )           | Rate constant for TNF release by TACE activity on a macrophage | $10^{-4}$ - $10^{-3}$ ( $4.4 \times 10^{-4}$ )                       | (1, 8-10)   |
| $k_{TACE\_Tcell}$ (s <sup>-1</sup> )         | Rate constant for TNF release by TACE activity on a T cell     | $10^{-5}$ - $10^{-4}$ ( $4.4 \times 10^{-5}$ )                       |             |
| $\delta_{TNF}$ (s <sup>-1</sup> )            | sTNF degradation rate constant                                 | $10^{-4}$ - $10^{-3}$ ( $4.58 \times 10^{-4}$ )                      | (11)        |
| $K_{d1}$ (M)                                 | Equilibrium dissociation constant of sTNF/TNFR1                | $10^{-12}$ - $10^{-10}$ ( $1.9 \times 10^{-11}$ )                    | (3, 12)     |
| $K_{d2}$ (M)                                 | Equilibrium dissociation constant of sTNF/TNFR2                | $10^{-10}$ - $10^{-9}$ ( $4.2 \times 10^{-10}$ )                     | (3, 12, 13) |
| $k_{on1}$ (M <sup>-1</sup> s <sup>-1</sup> ) | sTNF/TNFR1 association rate constant                           | $10^7$ - $10^8$ ( $2.8 \times 10^7$ )                                | (12)        |
| $k_{on2}$ (M <sup>-1</sup> s <sup>-1</sup> ) | sTNF/TNFR2 association rate constant                           | $10^7$ - $10^8$ ( $3.5 \times 10^7$ )                                | (12)        |
| $k_{off1}$ (s <sup>-1</sup> )                | sTNF/TNFR1 dissociation rate constant                          | $k_{on1} \times K_{d1}$                                              |             |
| $k_{off2}$ (s <sup>-1</sup> )                | sTNF/TNFR2 dissociation rate constant                          | $k_{on2} \times K_{d2}$                                              |             |
| $k_{int1}$ (s <sup>-1</sup> )                | TNFR1 internalization rate constant                            | $1.5 \times 10^{-4}$ - $1.5 \times 10^{-3}$ ( $7.7 \times 10^{-4}$ ) | (12, 14)    |
| $k_{int2}$ (s <sup>-1</sup> )                | TNFR2 internalization rate constant                            | $3.9 \times 10^{-4}$ - $5 \times 10^{-4}$ ( $4.6 \times 10^{-4}$ )   | (13)        |
| $k_{shed}$ (s <sup>-1</sup> )                | TNFR2 shedding rate constant                                   | $3.9 \times 10^{-4}$ - $1.5 \times 10^{-3}$ ( $5 \times 10^{-4}$ )   | (9, 14)     |
| $k_{rec1}$ (s <sup>-1</sup> )                | TNFR1 recycling rate constant                                  | $8.8 \times 10^{-5}$ - $5.5 \times 10^{-4}$ ( $1.8 \times 10^{-5}$ ) | (15, 16)    |
| $k_{rec2}$ (s <sup>-1</sup> )                | TNFR2 recycling rate constant                                  | $8.8 \times 10^{-5}$ - $5.5 \times 10^{-4}$ ( $1.8 \times 10^{-5}$ ) | (15, 16)    |
| $k_{t1}$ (s <sup>-1</sup> )                  | TNFR1 turn-over rate constant                                  | $3 \times 10^{-4}$ - $5 \times 10^{-4}$ ( $3.8 \times 10^{-4}$ )     | (15, 16)    |
| $k_{t2}$ (s <sup>-1</sup> )                  | TNFR2 turn-over rate constant                                  | $3 \times 10^{-4}$ - $5 \times 10^{-4}$ ( $3.8 \times 10^{-4}$ )     | (15, 16)    |
| $k_{deg1}$ (s <sup>-1</sup> )                | TNFR1 degradation rate constant                                | $10^{-5}$ - $10^{-4}$ ( $5 \times 10^{-5}$ )                         | (3, 15-17)  |
| $k_{deg2}$ (s <sup>-1</sup> )                | TNFR2 degradation rate constant                                | $10^{-5}$ - $10^{-4}$ ( $5 \times 10^{-5}$ )                         | (3, 15-17)  |
| $V_{r1\_mac}$ (#/cell.s)                     | Cell surface TNFR1 synthesis rate constant for macrophages     | $k_{t1} \times TNFR1_{mac}$                                          |             |
| $V_{r1\_Tcell}$ (#/cell.s)                   | Cell surface TNFR1 synthesis rate constant for T cells         | $k_{t1} \times TNFR1_{Tcell}$                                        |             |
| $V_{r2\_mac}$ (#/cell.s)                     | Cell surface TNFR2 synthesis rate constant for macrophages     | $k_{t2} \times TNFR2_{mac}$                                          |             |
| $V_{r2\_Tcell}$ (#/cell.s)                   | Cell surface TNFR2 synthesis rate constant for T cells         | $k_{t2} \times TNFR2_{Tcell}$                                        |             |

\* Ranges of parameter values used for sensitivity analysis are indicated out of parentheses. Values in parentheses are used to generate baseline model results.

<sup>†</sup> Baseline model values for TNFR densities on each recruited individual cell was randomly chosen from the range shown in parentheses.

<sup>‡</sup> Diffusion coefficients of the soluble species in granuloma were estimated in line with estimates for diffusible factors of similar molecular weight in tumors (6, 7).

1. Fallahi-Sichani, M., M. A. Schaller, D. E. Kirschner, S. L. Kunkel, and J. J. Linderman. 2010. Identification of key processes that control tumor necrosis factor availability in a tuberculosis granuloma. *PLoS Comput. Biol.* 6: e1000778.
2. Marino, S., D. Sud, H. Plessner, P. L. Lin, J. Chan, J. L. Flynn, and D. E. Kirschner. 2007. Differences in reactivation of tuberculosis induced from anti-TNF treatments are based on bioavailability in granulomatous tissue. *PLoS Comput. Biol.* 3: 1909-1924.
3. Imamura, K., D. Spriggs, and D. Kufe. 1987. Expression of tumor necrosis factor receptors on human monocytes and internalization of receptor bound ligand. *J. Immunol.* 139: 2989-2992.
4. Pocsik, E., R. Mihalik, F. Ali-Osman, and B. B. Aggarwal. 1994. Cell density-dependent regulation of cell surface expression of two types of human tumor necrosis factor receptors and its effect on cellular response. *J. Cell. Biochem.* 54: 453-464.
5. van Riemsdijk-Van Overbeeke, I. C., C. C. Baan, C. J. Knoop, E. H. Loonen, R. Zietse, and W. Weimar. 2001. Quantitative flow cytometry shows activation of the TNF-alpha system but not of the IL-2 system at the single cell level in renal replacement therapy. *Nephrol. Dial. Transplant.* 16: 1430-1435.
6. Nugent, L. J. and R. K. Jain. 1984. Extravascular diffusion in normal and neoplastic tissues. *Cancer Res.* 44: 238-244.
7. Pluen, A., Y. Boucher, S. Ramanujan, T. D. McKee, T. Gohongi, E. di Tomaso, E. B. Brown, Y. Izumi, R. B. Campbell, D. A. Berk, and R. K. Jain. 2001. Role of tumor-host interactions in interstitial diffusion of macromolecules: cranial vs. subcutaneous tumors. *Proc. Natl. Acad. Sci. U. S. A.* 98: 4628-4633.
8. Newton, R. C., K. A. Solomon, M. B. Covington, C. P. Decicco, P. J. Haley, S. M. Friedman, and K. Vaddi. 2001. Biology of TACE inhibition. *Ann. Rheum. Dis.* 60 Suppl 3: iii25-32.
9. Crowe, P. D., B. N. Walter, K. M. Mohler, C. Otten-Evans, R. A. Black, and C. F. Ware. 1995. A metalloprotease inhibitor blocks shedding of the 80-kD TNF receptor and TNF processing in T lymphocytes. *J. Exp. Med.* 181: 1205-1210.
10. Solomon, K. A., M. B. Covington, C. P. DeCicco, and R. C. Newton. 1997. The fate of pro-TNF-alpha following inhibition of metalloprotease-dependent processing to soluble TNF-alpha in human monocytes. *J. Immunol.* 159: 4524-4531.
11. Cheong, R., A. Bergmann, S. L. Werner, J. Regal, A. Hoffmann, and A. Levchenko. 2006. Transient IkappaB kinase activity mediates temporal NF-kappaB dynamics in response to a wide range of tumor necrosis factor-alpha doses. *J. Biol. Chem.* 281: 2945-2950.
12. Grell, M., H. Wajant, G. Zimmermann, and P. Scheurich. 1998. The type 1 receptor (CD120a) is the high-affinity receptor for soluble tumor necrosis factor. *Proc. Natl. Acad. Sci. U. S. A.* 95: 570-575.

13. Pennica, D., V. T. Lam, N. K. Mize, R. F. Weber, M. Lewis, B. M. Fendly, M. T. Lipari, and D. V. Goeddel. 1992. Biochemical properties of the 75-kDa tumor necrosis factor receptor. Characterization of ligand binding, internalization, and receptor phosphorylation. *J. Biol. Chem.* 267: 21172-21178.
14. Higuchi, M. and B. B. Aggarwal. 1994. TNF induces internalization of the p60 receptor and shedding of the p80 receptor. *J. Immunol.* 152: 3550-3558.
15. Vuk-Pavlovic, S. and J. S. Kovach. 1989. Recycling of tumor necrosis factor-alpha receptor in MCF-7 cells. *FASEB J.* 3: 2633-2640.
16. Bajzer, Z., A. C. Myers, and S. Vuk-Pavlovic. 1989. Binding, internalization, and intracellular processing of proteins interacting with recycling receptors. A kinetic analysis. *J. Biol. Chem.* 264: 13623-13631.
17. Tsujimoto, M., Y. K. Yip, and J. Vilcek. 1985. Tumor necrosis factor: specific binding and internalization in sensitive and resistant cells. *Proc. Natl. Acad. Sci. U. S. A.* 82: 7626-7630.

**Supplementary Table S3:** Definition of reaction species, reactions describing TNF/TNFR processes and their rates ( $v_i$ ).

| <b>Reaction species</b> |                                                                                                  |                     |                                                                                               |
|-------------------------|--------------------------------------------------------------------------------------------------|---------------------|-----------------------------------------------------------------------------------------------|
| $mTNF$                  | Membrane-bound TNF                                                                               | $sTNF/TNFR2$        | sTNF/TNFR2 complex on the membrane                                                            |
| $sTNF$                  | Extracellular soluble TNF                                                                        | $sTNF/TNFR1_i$      | Internalized sTNF/TNFR1 complex                                                               |
| $TNFR1$                 | Cell surface TNF receptor 1                                                                      | $sTNF/TNFR2_i$      | Internalized sTNF/TNFR2 complex                                                               |
| $TNFR2$                 | Cell surface TNF receptor 2                                                                      | $sTNF/TNFR2_{shed}$ | Shed sTNF/TNFR2 complex                                                                       |
| $sTNF/TNFR1$            | sTNF/TNFR1 complex on the membrane                                                               |                     |                                                                                               |
| <b>Model reactions</b>  |                                                                                                  |                     |                                                                                               |
| 1                       | $mTNF$ synthesis<br>$v_1 = k_{Synth}$                                                            | 9                   | $TNFR2$ synthesis<br>$v_9 = V_{r2}$                                                           |
| 2                       | $mTNF \rightarrow sTNF$<br>$v_2 = k_{TACE}[mTNF]$                                                | 10                  | $TNFR1 \rightarrow TNFR1_i$<br>$v_{10} = k_{i1}[TNFR1]$                                       |
| 3                       | $sTNF + TNFR1 \leftrightarrow sTNF/TNFR1$<br>$v_3 = k_{on1}[sTNF][TNFR1] - k_{off1}[sTNF/TNFR1]$ | 11                  | $TNFR2 \rightarrow TNFR2_i$<br>$v_{11} = k_{i2}[TNFR2]$                                       |
| 4                       | $sTNF + TNFR2 \leftrightarrow sTNF/TNFR2$<br>$v_4 = k_{on2}[sTNF][TNFR2] - k_{off2}[sTNF/TNFR2]$ | 12                  | $sTNF/TNFR1_i \rightarrow degradation$<br>$v_{12} = k_{deg1}[sTNF/TNFR1_i]$                   |
| 5                       | $sTNF/TNFR1 \rightarrow sTNF/TNFR1_i$<br>$v_5 = k_{int1}[sTNF/TNFR1]$                            | 13                  | $sTNF/TNFR2_i \rightarrow degradation$<br>$v_{13} = k_{deg2}[sTNF/TNFR2_i]$                   |
| 6                       | $sTNF/TNFR2 \rightarrow sTNF/TNFR2_i$<br>$v_6 = k_{int2}[sTNF/TNFR2]$                            | 14                  | $sTNF/TNFR1_i \rightarrow TNFR1$<br>$v_{14} = k_{rec1}[sTNF/TNFR1_i]$                         |
| 7                       | $sTNF/TNFR2 \rightarrow sTNF/TNFR2_{shed}$<br>$v_7 = k_{shed}[sTNF/TNFR2]$                       | 15                  | $sTNF/TNFR2_i \rightarrow TNFR2$<br>$v_{15} = k_{rec2}[sTNF/TNFR2_i]$                         |
| 8                       | $TNFR1$ synthesis<br>$v_8 = V_{r1}$                                                              | 16                  | $sTNF/TNFR2_{shed} \rightarrow sTNF + TNFR2_{shed}$<br>$v_{16} = k_{off2}[sTNF/TNFR2_{shed}]$ |

**Supplementary Table S4:** Differential equations describing TNF/TNFR processes.

---

|                                                                                   |                                                                                    |
|-----------------------------------------------------------------------------------|------------------------------------------------------------------------------------|
| $\frac{d[mTNF]}{dt} = v_1 - v_2$                                                  | $\frac{d[sTNF / TNFR2]}{dt} = v_4 - v_6 - v_7$                                     |
| $\frac{d[sTNF]}{dt} = \left(\frac{\rho}{N_{av}}\right)(v_2 - v_3 - v_4) + v_{16}$ | $\frac{d[sTNF / TNFR1_i]}{dt} = v_5 - v_{12} - v_{14}$                             |
| $\frac{d[TNFR1]}{dt} = v_8 - v_3 - v_{10} + v_{14}$                               | $\frac{d[sTNF / TNFR2_i]}{dt} = v_6 - v_{13} - v_{15}$                             |
| $\frac{d[TNFR2]}{dt} = v_9 - v_4 - v_{11} + v_{15}$                               | $\frac{d[sTNF / TNFR2_{shed}]}{dt} = \left(\frac{\rho}{N_{av}}\right)v_7 - v_{16}$ |
| $\frac{d[sTNF / TNFR1]}{dt} = v_3 - v_5$                                          |                                                                                    |

---



**Supplementary Table S5:** Linking parameters used to calculate the probability of TNF-induced cell responses, definitions and values estimated in this study

| <b>Parameter</b>                                            | <b>Parameter description</b>                                       | <b>Value*</b>                                                    |
|-------------------------------------------------------------|--------------------------------------------------------------------|------------------------------------------------------------------|
| $k_{NF-\kappa B}$ ((#/cell) <sup>-1</sup> s <sup>-1</sup> ) | Rate constant for TNF-induced NF-κB activation in macrophages      | 10 <sup>-8</sup> -10 <sup>-7</sup> (3.97×10 <sup>-8</sup> )      |
| $k_{apopt}$ ((#/cell) <sup>-1</sup> s <sup>-1</sup> )       | Rate constant for TNF-induced apoptosis in all cell types          | 5×10 <sup>-10</sup> -5×10 <sup>-9</sup> (1.33×10 <sup>-9</sup> ) |
| $\tau_{NF-\kappa B}$ (#/cell)                               | Cell surface sTNF/TNFR1 threshold for TNF-induced NF-κB activation | 5-50 (26)                                                        |
| $\tau_{apopt}$ (#/cell)                                     | Internalized sTNF/TNFR1 threshold for TNF-induced apoptosis        | 50-500 (300)                                                     |

\* Ranges of parameter values used for sensitivity analysis are indicated. Values in parentheses are used to generate baseline model results.

**Supplementary Table S6:** LHS sensitivity analysis results for the effect of TNF-independent and cellular scale parameters on model outputs at day 200 post-infection. Parameter definitions are presented in Supplementary Table S1.

|                                         | $D_{chem}$ | $\delta_{chem}$ | $\tau_{chem}$ | $P_{STAT1}$ | $M_{recr}$ | $T_{moveM}$ | $T_{recr}$ | $P_{apop/Fas}$ | $\tau_{recTgam}$ | $\alpha_{Bi}$ | $\alpha_{Be}$ |
|-----------------------------------------|------------|-----------------|---------------|-------------|------------|-------------|------------|----------------|------------------|---------------|---------------|
| <b>TNF function-related outputs</b>     |            |                 |               |             |            |             |            |                |                  |               |               |
| (No. apoptosis) <sub>Macs</sub>         | -          | +               | +             |             | ++         | ---         | ---        | -              | +++              | +++           |               |
| (No. apoptosis) <sub>Mr</sub>           | -          | +               |               |             | +++        | ---         | ---        |                | +++              | +++           |               |
| (No. apoptosis) <sub>Mi &amp; Mci</sub> | --         | ++              | +             | -           | +          | ---         | ---        |                | +++              | +++           |               |
| (No. apoptosis) <sub>Ma</sub>           |            |                 |               |             | +++        | ---         | ---        | -              | +++              | +++           |               |
| (No. apoptosis) <sub>T cells</sub>      | -          | ++              |               |             |            | ---         | ---        | -              | ++               | +++           |               |
| (No. NFκB activation) <sub>Mr</sub>     |            |                 | +             |             | +++        | ---         | ---        |                | +++              | +++           |               |
| (No. NFκB activation) <sub>Mi</sub>     | -          | ++              | +             | -           | +          | ---         | ---        |                | +++              | +++           |               |
| <b>Cellular-level outputs</b>           |            |                 |               |             |            |             |            |                |                  |               |               |
| B <sub>int</sub> (intracellular Mtb)    |            | +++             | +             | -           |            | ---         | ---        |                | +++              | +++           |               |
| B <sub>ext</sub> (extracellular Mtb)    | ---        | +++             |               | ---         |            | ---         | ---        |                | +++              | +++           | ++            |
| B <sub>tot</sub>                        | ---        | +++             |               | ---         |            | ---         | ---        |                | +++              | +++           | +             |
| Total Macrophages                       |            |                 | +             |             | +++        | ---         | -          |                | +++              | +++           |               |
| M <sub>r</sub>                          |            |                 | +             |             | +++        | --          |            |                | +++              | ++            |               |
| M <sub>i</sub>                          |            | +++             | ++            | -           |            | ---         | ---        |                | +++              | +++           |               |
| M <sub>ci</sub>                         |            | +++             |               | --          |            | ---         | ---        |                | +++              | +++           |               |
| M <sub>a</sub>                          |            | +               | +             |             |            | ---         | ---        |                | +++              | +++           |               |
| Total T cells                           |            |                 | +             |             |            | ---         |            | -              | +++              | +++           |               |
| T <sub>γ</sub>                          | +          |                 | +             |             |            | ---         |            | -              | +++              | +++           |               |
| T <sub>c</sub>                          | +          |                 | +             |             |            | ---         |            | -              | +++              | +++           |               |
| T <sub>reg</sub>                        |            |                 | +             |             |            | ---         |            |                | +++              | +++           |               |
| <b>Tissue-level outputs</b>             |            |                 |               |             |            |             |            |                |                  |               |               |
| Caseation                               |            | ++              | +             | -           | +++        | ---         | ---        |                | +++              | +++           |               |
| Granuloma size                          |            |                 |               | -           | ++         | ---         | ---        | -              | +++              | +++           |               |
| <b>Tissue concentrations</b>            |            |                 |               |             |            |             |            |                |                  |               |               |
| [sTNF] <sub>avg</sub>                   |            | +++             | +             | -           |            | ---         | ---        |                | +++              | +++           |               |
| [Chemokines] <sub>avg</sub>             |            |                 | +             |             |            | ---         | ---        |                | +++              | +++           |               |

Only parameters with significant PRCC values are indicated. Significant positive and negative correlations are shown using +/- as follows:

-/+,  $0.001 < p\text{-value} < 0.01$

--/++,  $0.0001 < p\text{-value} < 0.001$

---/+++,  $p\text{-value} < 0.0001$

**Supplementary Table S7:** LHS sensitivity analysis results for the effect of TNF/TNFR-associated molecular and linking parameters on model outputs at day 200 post-infection. Parameter definitions are presented in Supplementary Tables S2 and S5.

|                                         | $D_I$ | $\delta_{TNF}$ | $k_{synthMac}$ | $K_{dI}$ | $k_{intI}$ | $k_{recI}$ | $TNFR1_{mac}$ | $k_{apop}$ | $\tau_{apop}$ | $k_{NF\kappa B}$ | $\tau_{NF\kappa B}$ |
|-----------------------------------------|-------|----------------|----------------|----------|------------|------------|---------------|------------|---------------|------------------|---------------------|
| <b>TNF function-related outputs</b>     |       |                |                |          |            |            |               |            |               |                  |                     |
| (No. apoptosis) <sub>Macs</sub>         | +     | ---            | +++            | -        | ---        | ---        |               | ++         | ---           |                  |                     |
| (No. apoptosis) <sub>Mr</sub>           | +++   | ---            | +++            | -        | ---        | ---        |               | +          | ---           |                  |                     |
| (No. apoptosis) <sub>Mi &amp; Mci</sub> |       |                | ---            | ---      | +++        | ---        |               | +++        | ---           | ---              |                     |
| (No. apoptosis) <sub>Ma</sub>           |       | ---            | +++            | -        | ---        | ---        |               | +          | -             |                  |                     |
| (No. apoptosis) <sub>T cells</sub>      |       |                | +++            |          |            | --         |               |            | --            |                  |                     |
| (No. NFκB activation) <sub>Mr</sub>     | +++   | --             | +++            |          | ---        | +++        |               | -          |               | +++              | ---                 |
| (No. NFκB activation) <sub>Mi</sub>     | -     |                | ---            | -        |            | +          |               |            |               |                  |                     |
| <b>Cellular-level outputs</b>           |       |                |                |          |            |            |               |            |               |                  |                     |
| B <sub>int</sub> (intracellular Mtb)    |       | ++             | ---            |          | +          |            | -             |            |               | ---              | ++                  |
| B <sub>ext</sub> (extracellular Mtb)    |       | ++             | ---            |          | +          |            | -             |            |               | ---              | ++                  |
| B <sub>tot</sub>                        |       | ++             | ---            | +        | +          |            | -             |            |               | ---              | ++                  |
| Total Macrophages                       |       | +++            | ---            | +        |            |            | ---           |            |               | ---              | ++                  |
| M <sub>r</sub>                          |       | ++             | ---            | +        | +          |            | ---           |            |               | ---              | ++                  |
| M <sub>i</sub>                          |       | +              | ---            |          | +          |            | -             |            |               | ---              | +                   |
| M <sub>ci</sub>                         |       | +              | ---            |          | +          |            | -             |            |               | ---              | ++                  |
| M <sub>a</sub>                          |       |                | ---            |          |            |            |               |            |               | ---              |                     |
| Total T cells                           |       | +              | ---            | +        |            |            | -             |            |               | ---              | +                   |
| T <sub>γ</sub>                          |       | +              | ---            | +        |            |            | -             |            |               | ---              | +                   |
| T <sub>c</sub>                          |       | +              | ---            | +        |            |            | -             |            |               | ---              | +                   |
| T <sub>reg</sub>                        |       | +              | ---            | +        | +          |            | -             |            |               | ---              | +                   |
| <b>Tissue-level outputs</b>             |       |                |                |          |            |            |               |            |               |                  |                     |
| Caseation                               |       | +++            | ---            | +++      | +          | +++        | ---           | -          |               | ---              | ++                  |
| Granuloma size                          |       | +++            | ---            | ++       | +          |            | --            |            |               | ---              | +++                 |
| <b>Tissue concentrations</b>            |       |                |                |          |            |            |               |            |               |                  |                     |
| [sTNF] <sub>avg</sub>                   |       |                | ---            | +        |            |            | -             |            |               | ---              | +                   |
| [Chemokines] <sub>avg</sub>             |       | +              | ---            | +        |            |            | -             |            |               | ---              | +                   |

Only parameters with significant PRCC values are indicated. Significant positive and negative correlations are shown using +/- as follows:

-/+, 0.001 <  $p$ -value < 0.01

--/+++, 0.0001 <  $p$ -value < 0.001

---/++++,  $p$ -value < 0.0001
